# Supplementary material for: Subjective Health Literacy among School-Aged Children: First Evidence from Lithuania
Source: PubMed Central journal article supplement (PMC6765916; doi:10.3390/ijerph16183397), 2019-09-13
Supplement: ijerph-16-03397-s001.pdf [file ijerph-16-03397-s001.pdf]

**Supplementary Table 1.** Percentage distributions of the items in the Health Literacy by gender

|                                                                                   | Boys (n=1125)   |             |               |                 | Girls (n=1244)  |             |               |                 | $\chi^2$ (df) |
|-----------------------------------------------------------------------------------|-----------------|-------------|---------------|-----------------|-----------------|-------------|---------------|-----------------|---------------|
|                                                                                   | Not at all true | Barely true | Somewhat true | Absolutely true | Not at all true | Barely true | Somewhat true | Absolutely True |               |
| <i>Theoretical knowledge</i>                                                      |                 |             |               |                 |                 |             |               |                 |               |
| Having good information regarding health                                          | 3.4             | 8.8         | 57.8          | 30.0            | 1.7             | 7.6         | 62.5          | 28.2            | 10.8(3)**     |
| Ability to give examples of things that promote health                            | 4.9             | 18.8        | 50.8          | 25.6            | 1.7             | 7.0         | 52.1          | 29.2            | 22.92(3)***   |
| <i>Practical knowledge</i>                                                        |                 |             |               |                 |                 |             |               |                 |               |
| Ability to find health-related information that is easy to understand             | 3.7             | 15.0        | 47.2          | 34.1            | 1.4             | 10.2        | 46.9          | 41.5            | 31.55(3)***   |
| Ability to follow the instructions given by doctors and nurses                    | 4.7             | 11.8        | 39.5          | 44.0            | 2.2             | 8.1         | 37.3          | 52.4            | 28.85(3)***   |
| <i>Critical thinking</i>                                                          |                 |             |               |                 |                 |             |               |                 |               |
| Ability to decide if health-related information is right or wrong                 | 3.9             | 24.5        | 49.6          | 22.0            | 2.7             | 19.0        | 56.2          | 22.1            | 15.53(3)***   |
| Ability to compare health-related information from different sources              | 5.6             | 25.5        | 50.4          | 18.5            | 2.9             | 22.3        | 56.1          | 18.7            | 16.36(3)***   |
| <i>Self-awareness</i>                                                             |                 |             |               |                 |                 |             |               |                 |               |
| Ability to justify one's own choices regarding health                             | 4.1             | 16.9        | 54.8          | 24.2            | 1.4             | 14.5        | 54.2          | 29.9            | 26.65(3)***   |
| Ability to judge how one's own behaviour affects one's health                     | 3.4             | 12.1        | 46.8          | 37.7            | 1.5             | 7.6         | 48.1          | 42.8            | 24.47(3)***   |
| <i>Citizenship</i>                                                                |                 |             |               |                 |                 |             |               |                 |               |
| Ability to judge how one's own actions affect the surrounding natural environment | 4.0             | 18.3        | 49.2          | 28.5            | 1.8             | 13.2        | 54.3          | 30.7            | 22.96(3)***   |
| Ability to give ideas on how to improve health in one's immediate surroundings    | 4.7             | 20.3        | 53.9          | 21.1            | 2.7             | 19.2        | 56.2          | 21.9            | 7.98(3)*      |

Note: \* p < .5, \*\* p < .01, \*\*\* p < .001
